# Supplementary material
Source: publisher figshare collection journal article supplement (https://sage.figshare.com/ndownloader/files/21327741)
Supplement: Supplementary file 1 [file 21327741]

| Case nr. | Gender | Age at surgery | Primary diagnosis | Age at primary repair | Previous secondary palate procedures | Nasality | | Nasal emission | | Final speech outcome |
| --- | --- | --- | --- | --- | --- | --- | --- | --- | --- | --- |
| Preop. | Postop. | Preop. | Postop. |
| 1  2  3  4  5  6  7  8  9  10  11  12  13  14  15  16  17  18  19  20  21  22  23  24 | F  F  F  M  F  F  F  M  F  F  F  M  F  M  F  F  F  M  M  M  F  F  F  M | 10.5 yr  15 yr  9.5 yr  11 yr  7 yr  9 yr  6.5 yr  15 yr  13.5 yr  12 yr  12 yr  8 yr  8.5 yr  11 yr  10 yr  9 yr  13 yr  11 yr  15 yr  8 yr  14 yr  13 yr  9.5 yr  4.5 yr | BCLP  BCLP  CP  BCLP  BCLP  UCLP  UCLP  BCLP  BCLP  BCLP  BCLP  UCLP  UCLP  BCLP  CP  CP  BCLP  UCLP  UCLP  BCLP  BCLP  CLP  BCLP  UCLP | 9 mo and  1.5 yr*  2.5 yr  2 yr  10 mo  1.5 yr  1 yr  11 mo  4 mo and  9 mo*  9 mo  1 yr  1 yr  11 mo  9 mo  2 yr  1.5 yr  1.5 yr  10 mo  1.5 yr  6 mo  3 yr  10 mo  1.5 yr  10 mo  2 yr | Fistula repair  -  Fistula repair  -  Fistula repair  -  -  Fistula repair  Fistula repair  Pharyngeal flap  Re-repair  Fistula repair (twice)  Re-repair  Pharyngoplasty  Dehiscence repair  Fistula repair  Re-repair  Re-repair  Dehiscence repair  Fistula repair  Re-repair  -  Re-repair  Fistula repair  Re-repair  Fistula repair  Re-repair  -  Fistula repair  -  -  Fistula repair  Fistula repair | 3  3  3  2  2  3  1  3  2  3  3  2  2  2  2  1  2  1  3  2  2  2  3  3 | 2  1  1  1  2  1  0  1  2  1  2  1  0  1  1  0  1  1  1  0  0  1  0  2 | 3  2  3  2  3  2  2  3  2  3  3  1  0  2  2  1  2  1  3  0  1  3  1  3 | 1  0  2  1  2  0  0  2  1  1  3  1  0  1  1  0  2  1  2  1  0  1  2  1 | Improved  Improved  Improved  Improved  No change  Improved  Resolved  Improved  No change  Improved  Improved  Improved  Resolved  Improved  Improved  Resolved  Improved  No change  Improved  Resolved  Resolved  Improved  Resolved  Improved |
| Excluded patients | | | | | | | | | | |
| 25  26  27  28  29  30 | F  M  M  F  F  F | 11 yr  9 yr  3.5 yr  25 yr  6 yr  7 yr | CP  CP  UCLP  UCLP  UCLP  BCLP | 2 yr  1 yr  9 mo  1.5 yr  1 yr  10 mo | Re-repair  -  Fistula repair  Fistula Repair  Pharyngeal flap  -  - |  |  |  |  |  |

*Two-stage repair of the palate
